# Supplementary material for: A type-II semiconductor (ZnO/CuS heterostructure) for visible light photocatalysis
Source: Royal Society of Chemistry journal article supplement (doi:10.1039/c3ta15446g), 2014-01-01
Supplement: c3ta15446g1.pdf [file c3ta15446g1.pdf]

## Electronic Supplementary Information (ESI)

### **A type-II semiconductor (ZnO/CuS Heterostructure) for visible light photocatalysis**

Mrinmoyee Basu<sup>a</sup>, Neha Garg<sup>a</sup> and Ashok K. Ganguli<sup>a,b</sup>

#### **Mechanism:**

For the synthesis of ZnO nanotubes Zn(II)- acetate has been used as precursor of ZnO and pyridine has been used as hydrolyzing agent. In the reaction condition pyridine hydrolyses to give OH<sup>-</sup> ions and Zn(II)-acetate hydrolyses to give intermediate Zn(OH)<sub>2</sub>. Finally dehydration of Zn(OH)<sub>2</sub> molecules gives rise ZnO.

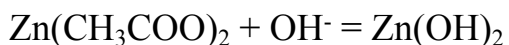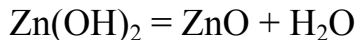

The as-synthesized ZnO has been applied as seed in the synthesis of ZnO/CuO heterostructure. Synthesis of ZnO in alkaline medium induces negative charges on the ZnO surface. When Cu<sup>2+</sup> is immobilized on the surface of ZnO, Cu<sup>2+</sup> remains on the surface of ZnO nanotube due to the electrostatic interaction with hydroxyl ions which makes normally white ZnO turn blue. Alkali treatment leads to the formation of Cu(OH)<sub>2</sub> on the surface of ZnO and is finally converted to CuO. This ZnO/CuO heterostructure is converted to ZnO/CuS in presence of thioacetamide. Thioacetamide hydrolyses to give free S<sup>2-</sup> ion in solution, which reacts with ZnO/CuO to give ZnO/CuS heterostructures.

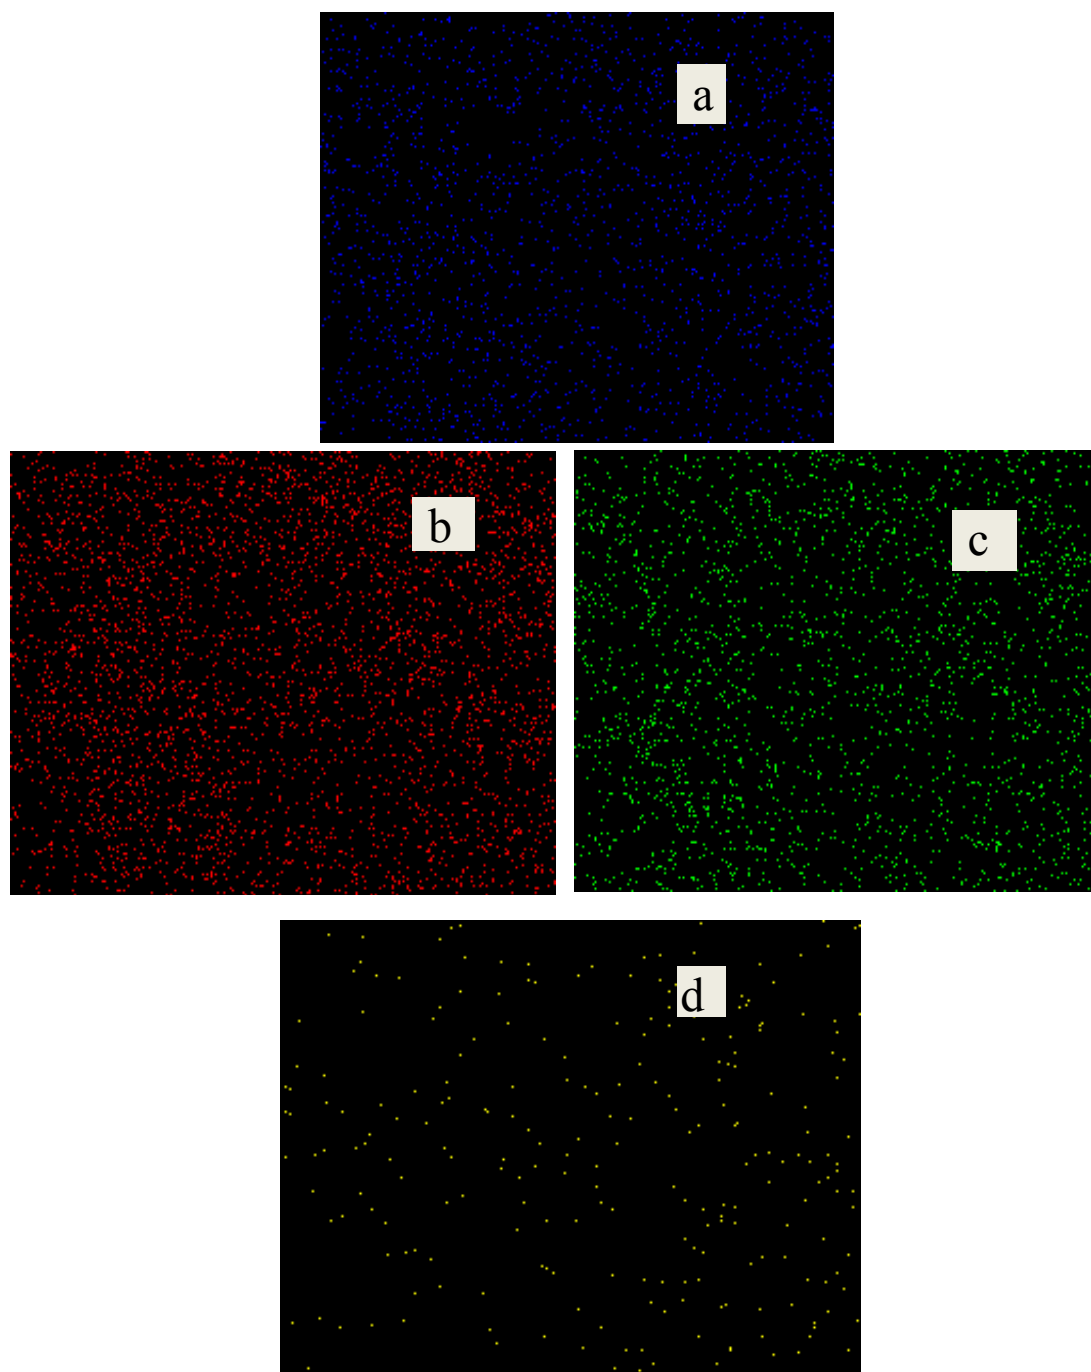

Fig. S1. EDS mapping of ZnO/CuS sample showing the homogeneous distribution of (a) Zn, (b) O, (c) Cu, (d) S.

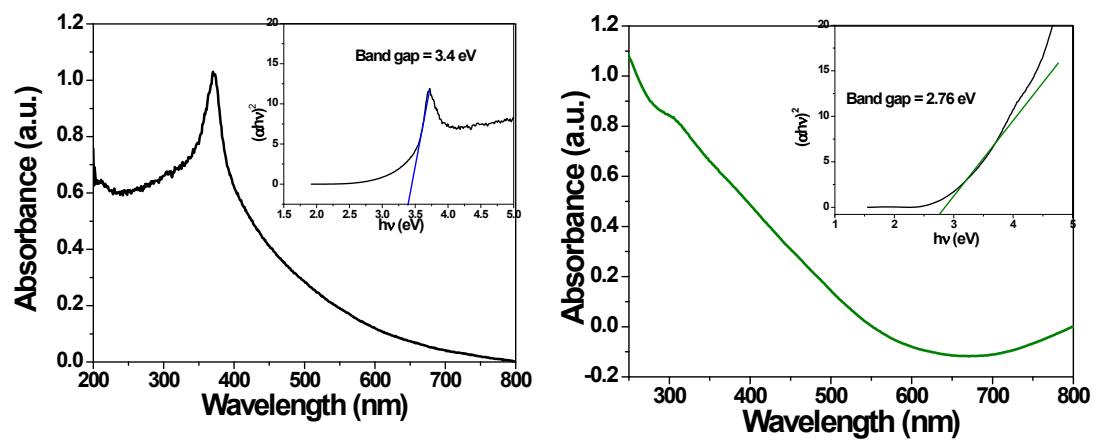

Fig. S2. UV-visible spectra of (a) bare ZnO, (b) bare CuS and the inset data showing the band gap values of both the materials.

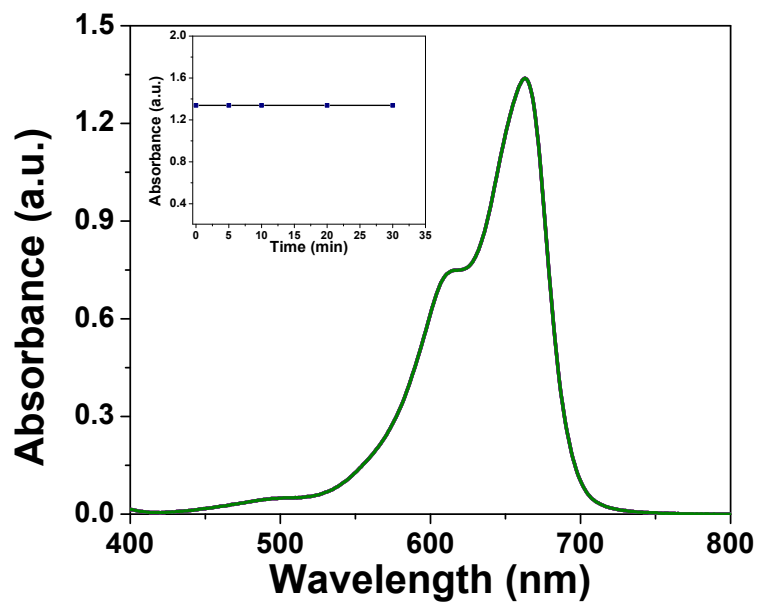

Fig. S3. UV-visible spectra of Methylene blue under irradiation of visible light up to 30 min and the inset data shows that plot of absorbance vs time.
